# Supplementary material for: The Impact of Non-Adherence to Antihypertensive Drug Therapy
Source: MDPI journal article supplement (doi:10.3390/healthcare11222979), 2023-11-18
Supplement: s1 [file s1]

**Supplemental Table S1. Summary Statistics:**

|                                             | <b>Number<br/>of<br/>Counties</b> | <b>Mean</b> | <b>SD</b> | <b>Minimum</b> | <b>Maximum</b> |
|---------------------------------------------|-----------------------------------|-------------|-----------|----------------|----------------|
| <b>BP Nonadherence (%)</b>                  | 3196                              | 26.59       | 5.34      | 15.90          | 56.20          |
| <b>Diuretic Nonadherence (%)</b>            | 3213                              | 28.77       | 4.68      | 16.40          | 51.40          |
| <b>RAAS Nonadherence (%)</b>                | 3213                              | 20.26       | 3.95      | 12.20          | 49.60          |
| <b>CVA Death All (%)</b>                    | 3212                              | 77.76       | 16.78     | 17.50          | 208.90         |
| <b>CVA Hospitalizations All (%)</b>         | 3209                              | 10.64       | 2.68      | 1.60           | 23.00          |
| <b>Total CVD Deaths All (%)</b>             | 3217                              | 467.27      | 101.72    | 147.70         | 1132.80        |
| <b>Total CVD Hospitalizations All (%)</b>   | 3210                              | 61.30       | 17.51     | 17.90          | 135.10         |
| <b>HTN Deaths All (%)</b>                   | 3217                              | 233.48      | 97.90     | 32.20          | 933.80         |
| <b>HTN Hospitalizations All (%)</b>         | 3082                              | 2.61        | 1.49      | 0.20           | 16.20          |
| <b>Insured (%)</b>                          | 3134                              | 12.02       | 5.07      | 2.10           | 37.40          |
| <b>Medicaid Eligible (%)</b>                | 2917                              | 23.05       | 8.42      | 0.60           | 62.00          |
| <b>No High School (%)</b>                   | 3213                              | 14.95       | 7.04      | 1.60           | 53.70          |
| <b>No College (%)</b>                       | 3213                              | 79.59       | 8.95      | 21.20          | 98.10          |
| <b>Female HOH (%)</b>                       | 3213                              | 17.30       | 6.91      | 0.00           | 52.20          |
| <b>Food stamp (%)</b>                       | 3134                              | 14.98       | 7.65      | 0.20           | 56.40          |
| <b>Median Home Value (%)</b>                | 3211                              | 132.97      | 77.14     | 32.30          | 902.50         |
| <b>Median Household Income (%)</b>          | 3134                              | 48.60       | 12.35     | 22.90          | 125.90         |
| <b>Income Inequality (Gini Coefficient)</b> | 3213                              | 0.44        | 0.04      | 0.33           | 0.62           |
| <b>Poverty (%)</b>                          | 3134                              | 16.27       | 6.44      | 3.40           | 47.40          |
| <b>Unemployment (%)</b>                     | 3212                              | 4.53        | 2.11      | 1.20           | 21.40          |
